# Supplementary material for: Construction of perovskite oxide/modified biochar for photothermal synergistic catalytic degradation of VOCs
Source: Royal Society of Chemistry journal article supplement (doi:10.1039/d4nj05408c), 2025-01-01
Supplement: d4nj05408c1.pdf [file d4nj05408c1.pdf]

# Supporting Information

## Construction of perovskite oxide/modified biochar for photothermal synergistic catalytic degradation of VOCs

Liang Zhang<sup>a</sup>, Yilong Yang<sup>b</sup>, Yao Xiao<sup>b</sup>, Xiazhang Li<sup>b,\*</sup>

<sup>a</sup>School of Intelligent Manufacturing, Changzhou Vocational Institute of Engineering,  
Changzhou 213164, China;

<sup>b</sup>National-local Joint Engineering Research Center of Biomass Refining and High-  
quality Utilization, Changzhou University, Changzhou 213164, PR China

Corresponding author: [xiazhang@cczu.edu.cn](mailto:xiazhang@cczu.edu.cn) (X.Li)

### 1. O<sub>2</sub>-TPD experiment

Oxygen temperature-programmed desorption (O<sub>2</sub>-TPD) experiment was performed on a Micromeritics AutoChem 2920 chemisorption instrument equipped with a TCD to quantify the O<sub>2</sub> desorption. Firstly, 0.1 g catalyst was placed into a quartz reactor heating to 300 °C with a rate of 10 °C/min and kept at this temperature for 1 h under a He flow (40 mL/min). Next, the temperature was cooled to room temperature, and adsorbing gases flow (5% O<sub>2</sub>/He, 50 mL/min) was introduced and passed through the catalyst for 30 min. Finally, the sample was continued to purge in a He flow (50 mL/min) for 30 min, and then the desorption O<sub>2</sub> signal was recorded between 50 °C to 600 °C with a rate of 10 °C/min.

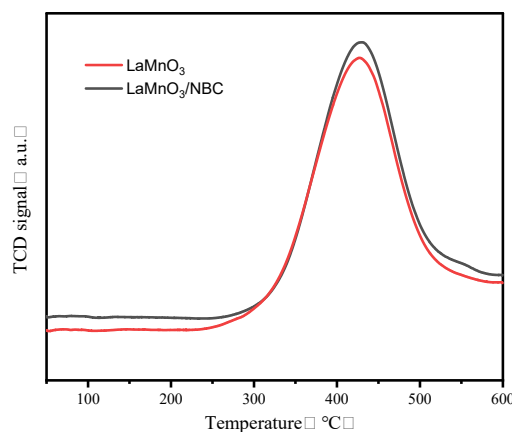

Fig. S1 O<sub>2</sub>-TPD profiles of LaMnO<sub>3</sub> and LaMnO<sub>3</sub>/NBC composite

## 2 *In-situ* DRIFTS characterization

The *in situ* diffuse reflectance Fourier transform infrared spectroscopy (*in situ* DRIFTS) experiments were performed on Nicolet iS20 FT-IR instrument with a MCT detector. Firstly, the pretreated sample was activated at 300°C for 30 minutes under N<sub>2</sub> flow. The background spectrum was collected in flowing N<sub>2</sub> environment at 30°C. Next, p-xylene was passed through at a rate of 30 mL/min via a water bubbler. After keeping in the dark environment for 30 minutes, air was introduced into the DRIFT cell and the sample was exposed to 300 W Xenon lamp irradiation.

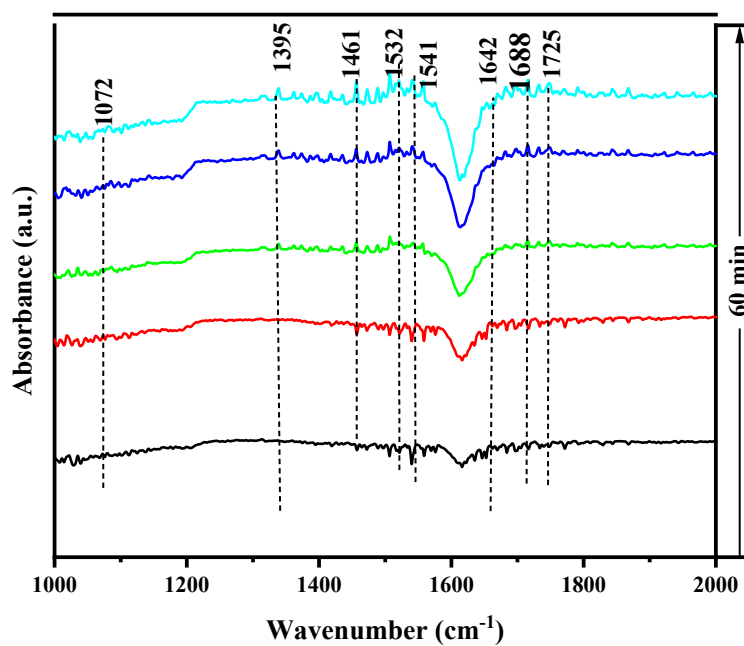

Fig. S2 *In-situ* DRIFTS study on LaMnO<sub>3</sub>/NBC composite : photothermal catalysis of p-xylene
